# Supplementary material
Source: ML conference proceedings conference paper supplement (https://proceedings.neurips.cc/paper_files/paper/2018/hash/1ef03ed0cd5863c550128836b28ec3e9-Abstract.html)
Supplement: Supplementary file [file 1ef03ed0cd5863c550128836b28ec3e9-Supplemental.zip]

## Supplemental Materials

### S1 Calculating $\nabla_{\theta} I_{\text{state}}(t)$

We want to evaluate:

$$\nabla_{\theta} I_{\text{state}} = \sum_g \rho_G(g) \sum_s (\nabla_{\theta} p(s | g)) \log \frac{p(s | g)}{p(s)} \quad (\text{S1})$$

$$+ \sum_g \rho_G(g) \sum_s p(s | g) \frac{\nabla_{\theta} p(s | g)}{p(s | g)} \quad (\text{S2})$$

$$- \sum_g \rho_G(g) \sum_s p(s | g) \frac{\nabla_{\theta} p(s)}{p(s)} \quad (\text{S3})$$

$$\equiv T_1 + T_2 - T_3, \quad (\text{S4})$$

where we denote the three terms by  $T_1$ ,  $T_2$ , and  $T_3$ . The effect of  $T_1$  follows from the policy gradient theorem and amounts to adding the following to the reward return:

$$\sum_{t'=t}^T \log \frac{p_{\text{emp}}(s_{t'} | g)}{p_{\text{emp}}(s_{t'})}. \quad (\text{S5})$$

By the same argument,  $T_2 = \sum_g p(g) \sum_s \nabla_{\theta} p(s | g)$  simply results in the addition of 1 to the info return at each time step.

Finally, we have the third term:

$$T_3 = \sum_g \rho_G(g) \sum_{s_t} \frac{p(s_t | g)}{p(s_t)} \nabla_{\theta} p(s_t) \quad (\text{S6})$$

$$= \sum_g \rho_G(g) \sum_{s_t} \frac{p(s_t | g)}{p(s_t)} \nabla_{\theta} \sum_{g'} \rho_G(g') \rho_S(s_0) \prod_{t'=0}^t \pi_{g'}(a_{t'} | s_{t'}) P(s_{t'+1} | s_{t'}, a_{t'}) \quad (\text{S7})$$

$$= \sum_g \rho_G(g) \sum_{s_t} \frac{p(s_t | g)}{p(s_t)} \sum_{g'} \rho_G(g') \rho_S(s_0) \prod_{t'=0}^t \left( \nabla_{\theta} \pi_{g'}(a_{t'} | s_{t'}) \right) P(s_{t'+1} | s_{t'}, a_{t'}) \quad (\text{S8})$$

$$= \sum_{g, s_t} \rho_G(g) \rho_S(s_0) \prod_{t'=0}^t \pi_g(a_{t'} | s_{t'}) P(s_{t'+1} | s_{t'}, a_{t'}) \times \quad (\text{S9})$$

$$\sum_{g'} \rho_G(g') \frac{\pi_{g'}(a_{t'} | s_{t'})}{\pi_g(a_{t'} | s_{t'})} \frac{\nabla_{\theta} \pi_{g'}(a_{t'} | s_{t'})}{\pi_{g'}(a_{t'} | s_{t'})} \frac{p(s_t | g)}{p(s_t)} \quad (\text{S10})$$

$$\equiv \mathbb{E}_{\tau} \left[ \sum_{g'} \rho_G(g') \prod_{t'=0}^t \frac{\pi_{g'}(a_{t'} | s_{t'})}{\pi_g(a_{t'} | s_{t'})} \left( \nabla_{\theta} \log \pi_{g'}(a_{t'} | s_{t'}) \right) \frac{p(s_t | g)}{p(s_t)} \right] \quad (\text{S11})$$

where in the fourth line we multiply and divide by the policy under both  $g$  and  $g'$  in order to employ the log derivative trick and to express the equation as an expectation under the present goal. The end result is the update in equation 11.

### S2 Experimental parameters and details

#### S2.1 Simple spatial navigation

In order to allow Bob to integrate information about the goal over time and remember it to guide future actions, we endow Bob with a recurrent neural network (RNN) to process Alice's state-action

pairs. We used a gated recurrent unit (GRU) Cho et al. [2014] to which Alice’s state-action pairs are fed as a one-hot vector. We chose to use a scalar core state for the GRU since it was simply tasked with tracking Bob’s belief about one of two goals, and could thus assign each goal to a sign of the GRU core state/output, which is what Bob chose to do in practice. The GRU output  $z_t = \text{RNN}(s_t^{\text{alice}}, a_t^{\text{alice}})$  was then concatenated with a one-hot representation of Bob’s own state  $s_t^{\text{bob}}$  and fed into a fully-connected, feed-forward layer of 128 units with two readout heads: a policy head (a linear layer with  $|\mathcal{A}|$  units followed by a softmax, yielding  $a_t^{\text{bob}} \sim \pi^{\text{bob}}(s_t^{\text{bob}}, z_t)$ ) and a value head (a single linear readout node, yielding  $v_t = V^{\text{bob}}(s_t^{\text{bob}}, z_t)$ ).

|                                                  | <b>Alice</b>         | <b>Bob</b>         |
|--------------------------------------------------|----------------------|--------------------|
| training time, in steps                          | 100k                 | 200k               |
| max episode length, in steps                     | 100                  | 100                |
| entropy bonus (logarithmically annealed from/to) | .5, .005             | .5, .01            |
| learning rate (Adam)                             | $2.5 \times 10^{-2}$ | $5 \times 10^{-5}$ |
| weight on value function regression term         | .5                   | .5                 |
| discount $\gamma$                                | .8                   | .8                 |

Table 1: **Training parameters.**

## S2.2 Key game

The only difference from the previous set of training parameters is that Alice now trains longer (250k instead of 100k steps).

|                                                  | <b>Alice</b>         | <b>Bob</b>         |
|--------------------------------------------------|----------------------|--------------------|
| training time, in steps                          | 250k                 | 200k               |
| max episode length, in steps                     | 100                  | 100                |
| entropy bonus (logarithmically annealed from/to) | .5, .005             | .5, .01            |
| learning rate (Adam)                             | $2.5 \times 10^{-2}$ | $5 \times 10^{-5}$ |
| weight on value function regression term         | .5                   | .5                 |
| discount $\gamma$                                | .8                   | .8                 |

Table 2: **Training parameters.**
